# Supplementary material for: Productivity of Concentration-Dependent Conversion of Substitutional Nitrogen Atoms into Nitrogen-Vacancy Quantum Emitters in Synthetic-Diamond by Ultrashort Laser Pulses
Source: MDPI journal article supplement (doi:10.3390/mi14071397), 2023-07-09
Supplement: s1 [file micromachines-2437921-supplementary.pdf › micromachines-2437921-supplementary.pdf]

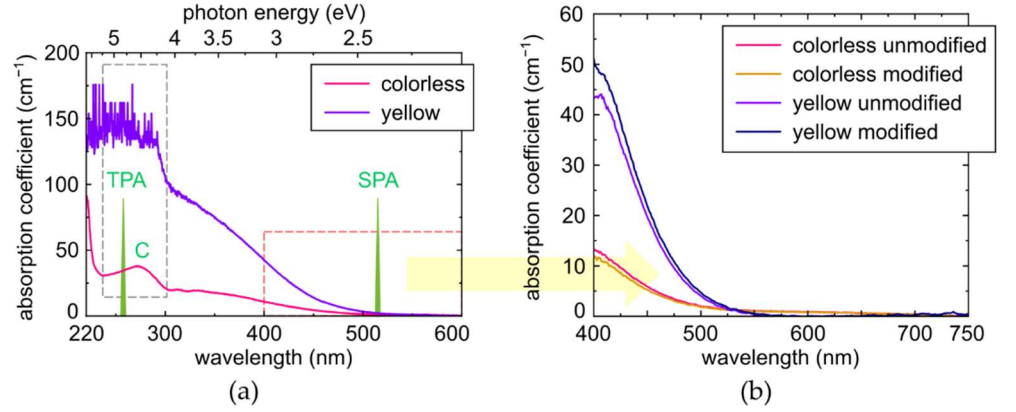

**Figure S1.** (a) Optical absorption coefficient spectra of the colorless (pink curve) and yellow (violet curve) zones inside the diamond plate, showing absorption of C-centers in 270-nm band and position of single (SPA)/two-photon (TPA) 515-nm laser absorption. (b) Optical absorption coefficient spectra of laser-modified spots relative to the reference unmodified ones in the colorless (pink and orange curves) and yellow (violet and blue curves) regions.

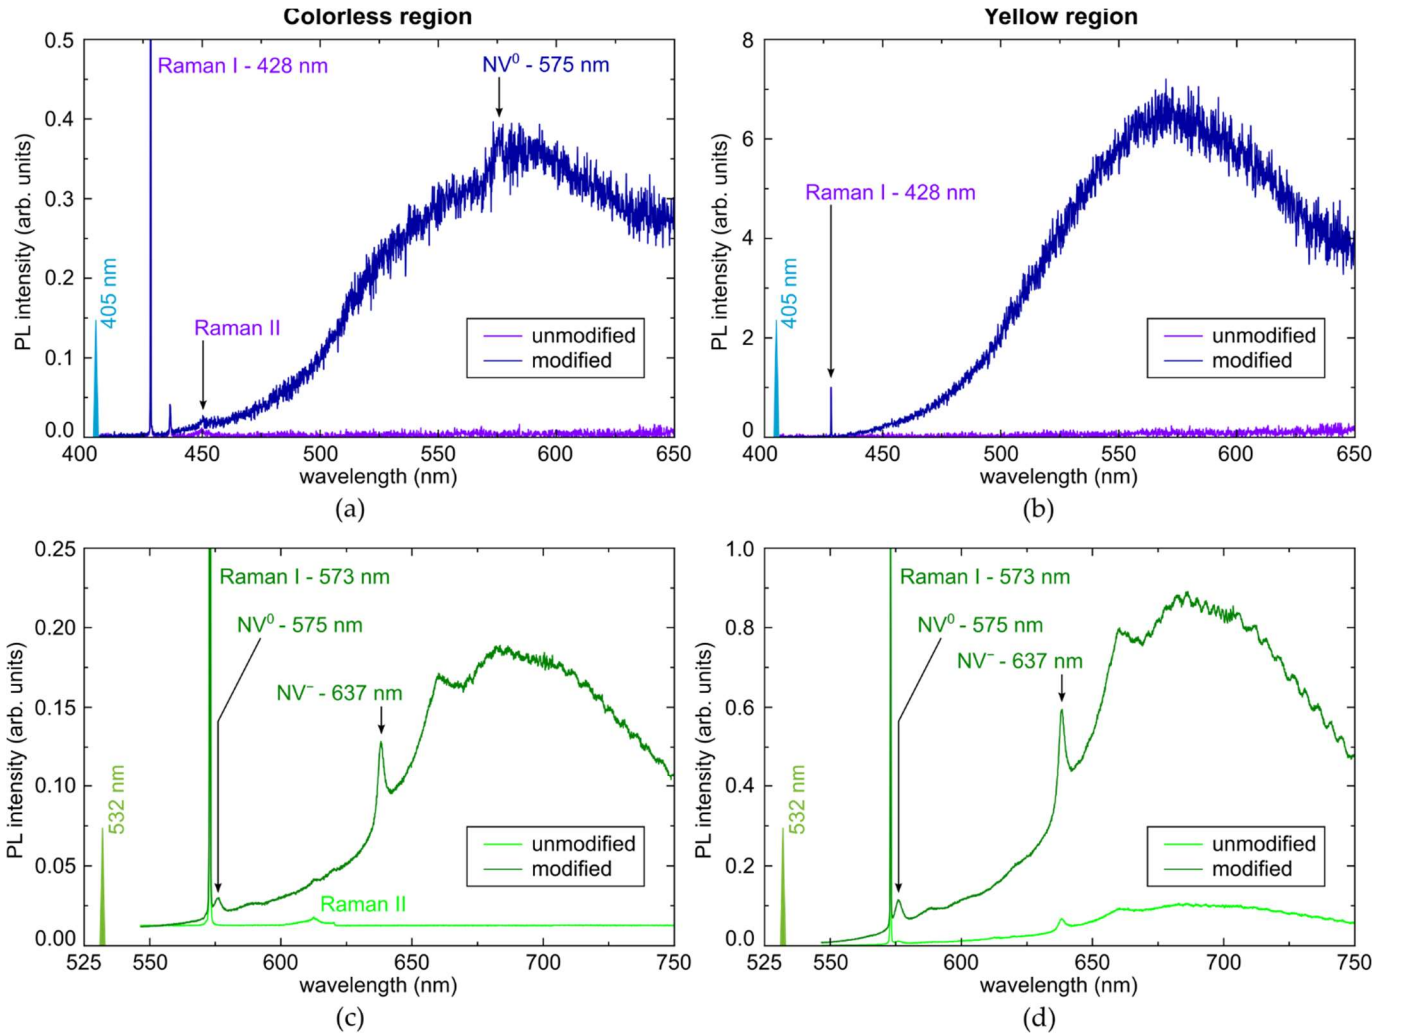

**Figure S2.** Room-temperature photoluminescence spectra of micromark in colorless (left column—(a,c)) and yellow (right column—(b,d)) regions, excited at 405-nm (top row—(a,b)) and 532-nm (bottom row—(c,d)) wavelength.

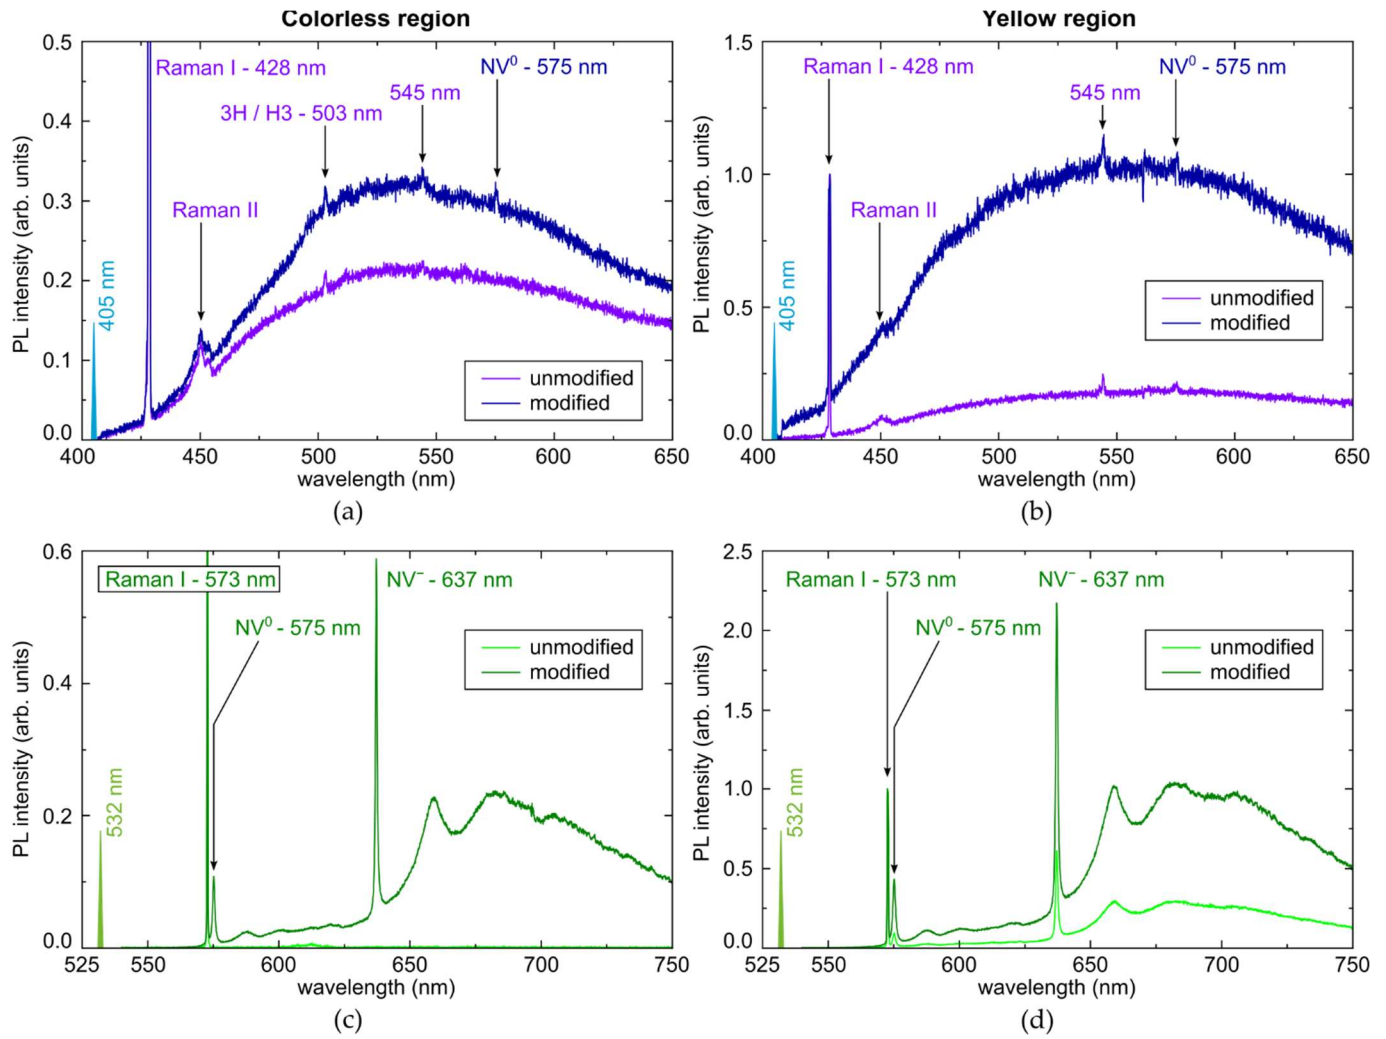

**Figure S3.** Liquid-nitrogen temperature (-190 °C) photoluminescence spectra of micromark in colorless (left column—(a,c)) and yellow (right column—(b,d)) regions, excited at 405-nm (top row—(a,b)) and 532-nm (bottom row—(c,d)) wavelength.

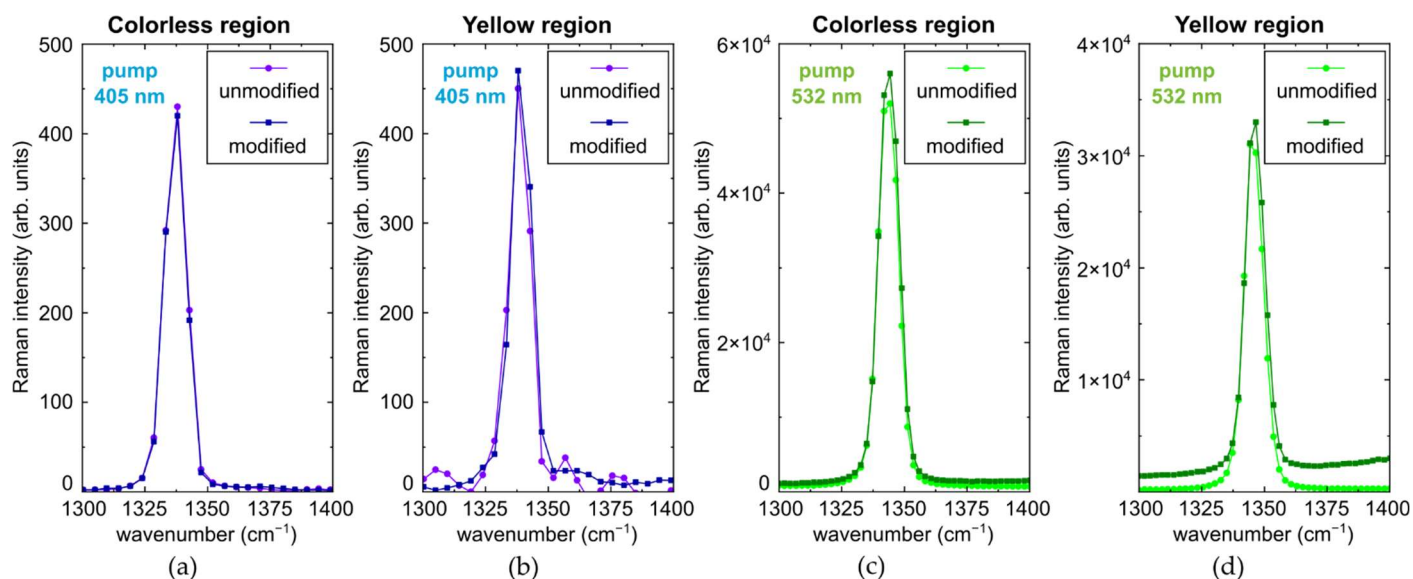

**Figure S4.** Raman I peak in room-temperature photoluminescence spectra of micromark in colorless (a,c) and yellow (b,d) regions, excited at 405-nm (a,b) and 532-nm (c,d) wavelength.

**Table S1.** Main characteristics of Raman I peak in room-temperature photoluminescence spectra.

| Region    | Excitation wavelength, nm | Unmodified/modified | Step*, cm <sup>-1</sup> | Position, cm <sup>-1</sup> | FWHM, cm <sup>-1</sup> |
|-----------|---------------------------|---------------------|-------------------------|----------------------------|------------------------|
| colorless | 405                       | unmodified          | 4.7                     | 1337.2                     | 10.2                   |
|           |                           | modified            | 4.7                     | 1337.2                     | 11.5                   |
|           | 532                       | unmodified          | 2.4                     | 1343.5                     | 9.6                    |
|           |                           | modified            | 2.4                     | 1343.8                     | 9.6                    |
| yellow    | 405                       | unmodified          | 4.7                     | 1340.0                     | 8.7                    |
|           |                           | modified            | 4.7                     | 1340.0                     | 11.7                   |
|           | 532                       | unmodified          | 2.4                     | 1345.0                     | 9.1                    |
|           |                           | modified            | 2.4                     | 1345.0                     | 9.5                    |

\* Spectrometer sampling step in the vicinity of the Raman peak.
